# Supplementary material
Source: Springer Nature journal article supplement (https://www.springermedizin.de/resource/supplementary/12978_2013_245_MOESM8_ESM.pdf/9602310)

80.00%  
70.00%  
60.00%  
50.00%  
40.00%  
30.00%  
20.00%  
10.00%  
0.00%

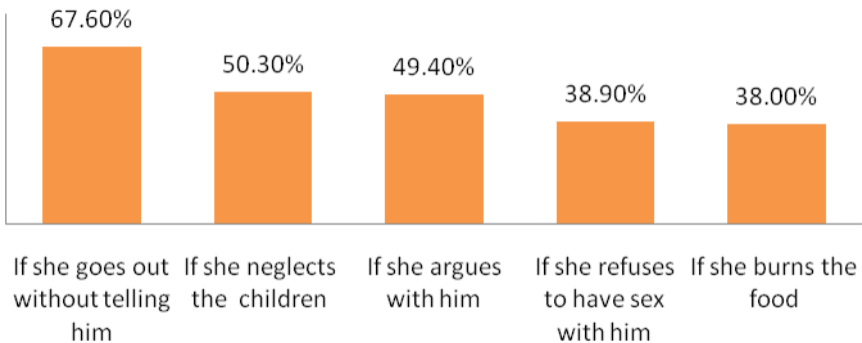

Supplement: MOESM8 [file 9602310]
